# Supplementary material
Source: publisher site journal article supplement (https://www.dovepress.com/article/316398)
Supplement: Supplementary file 1 [file get_supplementary_file.php]

**Supplementary Table 1** Comparisons on demographic and clinical characteristics at baseline between the patients who were followed up and who were lost. Differences were tested using *t*-test (for age and years of education), Chi-square test (for sex) or Mann-Whitney U test (for other clinical scales).

|  | Patients who were followed up (*n* = 35), mean ± SD | Patients who were lost (*n* = 15), mean ± SD | Significances of differences |
| --- | --- | --- | --- |
| Age (years) | 17.91 ± 3.60 | 18.73 ± 4.43 | *t* = -0.718, *p* = 0.476 |
| Gender (male/female) | 15/20 | 7/8 | Chi-Square= -0.062,  *p* = 0.804 |
| Education (years) | 10.74 ± 2.24 | 10.27 ± 3.11 | *t* = 0.612, *p* = 0.544 |
| WAIS-I scores | 17.09 ± 5.16 | 14.07 ± 6.18 | *p* = 0.080 |
| WAIS-DS scores | 68.17 ± 16.07 | 59.00 ± 14.47 | *p* = 0.112 |
| PANSS scores | 61.97 ± 21.86 | 55.06±28.347 | *p* = 0.727 |
| CTQ-SF scores |  |  |  |
| Emotional abuse | 9.23 ± 3.49 | 8.93 ± 3.65 | *p* = 0.757 |
| Physical abuse | 6.43 ± 2.23 | 7.93 ± 2.82 | *p* = 0.057 |
| Sexual abuse | 6.40 ± 2.49 | 7.20 ± 3.12 | *p* = 0.281 |
| Emotional neglect | 13.31 ± 4.82 | 14.47 ± 3.98 | *p* = 0.545 |
| Physical neglect | 8.89 ± 3.22 | 10.47 ± 1.85 | *p* = 0.032 |
| Total | 44.26 ±11.62 | 49.00 ± 10.29 | *p* = 0.127 |
